# Supplementary material
Source: PubMed Central journal article supplement (PMC4793884)
Supplement: coli021632.ww1_default.pdf [file coli021632.ww1_default.pdf]

**Appendix:** List of animated films and matched comparisons [posted as supplied by author]

| <b>Animated Film</b>            | <b>Rating</b> | <b>Release Date</b> | <b>Match 1</b>          | <b>Rating</b> | <b>Match 2</b>               | <b>Rating</b> |
|---------------------------------|---------------|---------------------|-------------------------|---------------|------------------------------|---------------|
| Snow White and the Seven Dwarfs | G             | 1937                | Saratoga                | 'Passed'      | Stella Dallas                | G             |
| Pinocchio                       | G             | 1940                | The Great Dictator      | G             | The Grapes of Wrath          | unrated       |
| Bambi                           | G             | 1942                | Mrs. Miniver            | G             | Yankee Doodle Dandy          | G             |
| Cinderella                      | G             | 1950                | Sunset Blvd.            | unrated       | All About Eve                | PG            |
| Peter Pan                       | G             | 1953                | The Robe                | unrated       | From Here to Eternity        | PG            |
| Lady and the Tramp              | G             | 1955                | Mister Roberts          | unrated       | Rebel Without a Cause        | PG-13         |
| Sleeping Beauty                 | G             | 1959                | Imitation of Life       | unrated       | Suddenly Last Summer         | unrated       |
| 101 Dalmatians                  | G             | 1961                | West Side Story         | unrated       | King of Kings                | PG-13         |
| The Jungle Book                 | G             | 1967                | The Graduate            | G             | Guess Who's Coming to Dinner | unrated       |
| The Little Mermaid              | G             | 1989                | Driving Miss Daisy      | PG            | Parenthood                   | PG-13         |
| Beauty and the Beast            | G             | 1991                | Fried Green Tomatoes    | PG-13         | Sleeping with the Enemy      | R             |
| Aladdin                         | G             | 1992                | The Bodyguard           | R             | A Few Good Men               | R             |
| The Lion King                   | G             | 1994                | Forrest Gump            | PG-13         | Pulp Fiction                 | R             |
| Pocahontas                      | G             | 1995                | While You Were Sleeping | PG            | Bridges of Madison County    | PG-13         |
| The Hunchback of Notre Dame     | G             | 1996                | Jerry Maguire           | R             | A Time to Kill               | R             |
| Hercules                        | G             | 1997                | Titanic                 | PG-13         | As Good as it Gets           | PG-13         |

| <b>Animated Film</b> | <b>Rating</b> | <b>Release Date</b> | <b>Match 1</b>             | <b>Rating</b> | <b>Match 2</b>           | <b>Rating</b> |
|----------------------|---------------|---------------------|----------------------------|---------------|--------------------------|---------------|
| A Bug's Life         | G             | 1998                | Patch Adams                | PG-13         | The Truman Show          | PG            |
| Mulan                | G             | 1998                | You've Got Mail            | PG            | Shakespeare in Love      | R             |
| The Prince of Egypt  | PG            | 1998                | Stepmom                    | PG-13         | City of Angels           | PG-13         |
| Tarzan               | G             | 1999                | The Sixth Sense            | PG-13         | The Green Mile           | R             |
| Dinosaur             | PG            | 2000                | What Lies Beneath          | PG-13         | Erin Brockovich          | R             |
| Monsters, Inc        | G             | 2001                | A Beautiful Mind           | PG-13         | Black Hawk Down          | R             |
| Shrek                | PG            | 2001                | The Others                 | PG-13         | Save the Last Dance      | PG-13         |
| Ice Age              | PG            | 2002                | Signs                      | PG-13         | Catch Me if You Can      | PG-13         |
| Lilo & Stitch        | PG            | 2002                | 8 Mile                     | R             | Road to Perdition        | R             |
| Finding Nemo         | G             | 2003                | Bruce Almighty             | PG-13         | Something's Gotta Give   | PG-13         |
| The Incredibles      | PG            | 2004                | The Passion of the Christ  | R             | The Village              | PG-13         |
| The Polar Express    | PG            | 2004                | The Aviator                | PG-13         | Collateral               | R             |
| Shark Tale           | PG            | 2004                | Million Dollar Baby        | PG-13         | The Notebook             | PG-13         |
| Madagascar           | PG            | 2005                | Walk The Line              | PG-13         | Brokeback Mountain       | R             |
| Chicken Little       | G             | 2005                | The Exorcism of Emily Rose | PG-13         | Coach Carter             | PG-13         |
| Happy Feet           | PG            | 2006                | Click                      | PG-13         | The Pursuit of Happyness | PG-13         |
| Over the Hedge       | PG            | 2006                | The Departed               | R             | The Devil Wears Prada    | PG-13         |

| <b>Animated Film</b>     | <b>Rating</b> | <b>Release Date</b> | <b>Match 1</b>    | <b>Rating</b> | <b>Match 2</b>          | <b>Rating</b> |
|--------------------------|---------------|---------------------|-------------------|---------------|-------------------------|---------------|
| Ratatouille              | G             | 2007                | I Am Legend       | PG-13         | Juno                    | PG-13         |
| Kung Fu Panda            | PG            | 2008                | Twilight          | PG-13         | Gran Torino             | R             |
| Horton Hears a Who!      | G             | 2008                | Marley & Me       | PG            | Slumdog Millionaire     | R             |
| Up                       | PG            | 2009                | The Proposal      | PG-13         | The Blind Side          | PG-13         |
| Despicable Me            | PG            | 2010                | The King's Speech | R             | Black Swan              | R             |
| How to Train Your Dragon | PG            | 2010                | Due Date          | R             | The Social Network      | PG-13         |
| Tangled                  | PG            | 2010                | The Fighter       | R             | The Town                | R             |
| Megamind                 | PG            | 2010                | Eat Pray Love     | PG-13         | Dear John               | PG-13         |
| Brave                    | PG            | 2012                | Les Miserables    | PG-13         | Lincoln                 | PG-13         |
| The Lorax                | PG            | 2012                | Argo              | R             | Silver Linings Playbook | R             |
| The Croods               | PG            | 2013                | The Butler        | PG-13         | Captain Phillips        | PG-13         |
| Frozen                   | PG            | 2013                | The Great Gatsby  | PG-13         | American Hustle         | R             |
